# Supplementary material for: Remembering to Remember: A Systematic Review and Meta-Analysis on Prospective Memory Rehabilitation in Adults with Acquired Brain Injury
Source: Research Square preprint supplement (doi:10.21203/rs.3.rs-7113515/v1), 2025-07-25
Supplement: Supplementary file 1 [file 6ee184e43f3a6cb90b8fed44.docx]

Table 2. GRADEpro

**Question:** Memory rehabilitation compared to the control condition.

| **Certainty assessment** | | | | | | | **№ of patients** | | **Effect SMD** | **Certainty** | **Importance** |
| --- | --- | --- | --- | --- | --- | --- | --- | --- | --- | --- | --- |
| **№ of studies** | **Study design** | **Risk of bias** | **Inconsistency** | **Indirectness** | **Imprecision** | **Other considerations** | **Memory rehabilitation** | **Control** | **Absolute (95% CI)** |
| PROSPECTIVE MEMORY | | | | | | | | | | | |
| 10 | randomized trials | seriousa | not serious | not serious | not serious | none | 243 | 234 | Hedge's g **0.55 SD**  (0.29 to 0.80) | ⨁⨁⨁◯ Moderate | IMPORTANT |

**CI:** confidence interval; **SMD:** standardized mean difference as Hedge's g

#### Explanations

a. Blinding of participants and researchers was reported in a small number of included studies
