# Supplementary material for: Remembering to Remember: A Systematic Review and Meta-Analysis on Prospective Memory Rehabilitation in Adults with Acquired Brain Injury
Source: Research Square preprint supplement (doi:10.21203/rs.3.rs-7113515/v1), 2025-07-25
Supplement: Supplementary file 2 [file 7d72c599f7c14d6ce3e17471.docx]

**Supplementary Tables**

Table S1: Clinic and demographic data of RCT studies, separated for studies focused on PM (Table S1a) and on both PM and STM/WM (Table S1b)

Table S2: Clinic and demographic data of nRCT studies, pre vs post studies and case series

Table S3: Type of intervention and results of memory rehabilitation RCT studies, separated for studies focused on PM (Table S3a) and on both PM and STM/WM (Table S3b)

Table S4: Results of memory rehabilitation nRCT studies, pre vs post studies and case series

**Table S1: Clinic and demographic data of RCT studies, separated for studies focused on PM (Table 1a) and on both PM and STM/WM (Table 1b)**

**Table S1a**

| **Citation** | **Sample and inclusion/exclusion criteria** | **Time since onset** | **Mean age (years)** | **Education (years)** | **Country** |
| --- | --- | --- | --- | --- | --- |
| Aben et al. 32 | Total *n=* 153 Stroke  EG *n*= 77  < 65 years: 57  > 65 years: 20  CG *n*= 76  < 65 years: 58  > 65 years: 18  *Inclusion:*  18 months or more post-onset; etiology: stroke; age between 18 and 80 years; living independently; reported subjective memory complaints | <65 years: 50.66 months (SD= 38.34)  >65 years: 57.30 months (SD= 42.81)  <65 years: 55.11 months (SD= 34.99)  >65 years: 56.06 months (SD= 36.35) | <65 years: 54  (SD= 8.42)  >65 years: 70  (SD= 4.66)  <65 years: 54.36  (SD= 7.11)  >65 years: 69.11  (SD= 3.43) | <65 years: 82.1%  < high  >65 years: 75%  < high  <65 years: 80.7%  < high  >65 years: 72.2% < high | The Netherlands |
| das Nair et al. 33 | Total *n*= 328 TBI  EG *n*= 171  CG *n*= 157  *Inclusion*:  TBI more than 3 months prior to study; memory deficit (score ⩾ 24 on the EMQ, or score < 25 th percentile on RBMT-3; 18-69 years old. | median 46 months (25th, 75th centile: 23, 116)  median 58 months (25th, 75th centile: 24, 148) | 45.8 (SD= 11.5)  45.1 (SD= 12.5) | < GCSE= 29; GCSE= 49; A-level= 34; Degree= 41; > degree*=* 17; unknown=1  < GCSE= 26; GCSE= 54; A-level= 42; Degree= 24; > degree*=* 10; unknown=1 | UK |
| Fleming et al. 34 | Total *n=* 52 TBI  COMP-MST (Compensatory Strategy Training + Metacognitive Skill Training) *n*= 17  COMP (Compensatory Strategy Training) *n*= 17  CG (Waitlist Control) *n*= 18  *Inclusion:*  moderate or severe TBI (accordingly to GCS); adults in working age rage; caregivers available to participate; impairment in Prospective Memory (also self reported); discharge from hospital ⩾ 1 month; no prior brain injury; adequate language skills; ambulant or independently mobile; able to attend hospital for the 6 weeks intervention | 1273.35 days(SD=1334.59)  1470.71 days(SD=1861.71)  1572.33 days(SD=2773.53) | 37.35 (SD= 13.38)  40.24 (SD= 14.02)  39.44 (SD= 14.11) | 13.94 (SD= 2.38)  13.12 (SD= 2.55)  13.25 (SD= 2.65) | Australia |
| Lannin et al. 35 | Total *n=* 39 ABI  TBI: closed *n*= 31 (79.5%); Initially closed with neurosurgery *n*= 2 (5.1%)  Other ABI diagnoses *n=* 6 (15.4%)  EG *n*= 21 (TBI *n*=15; ABI *n*=4)  CG *n*= 21 (TBI *n*=18; ABI *n*=2)  *Inclusion:*  age ≥17 years, diagnosis of acquired brain injury, demonstrated a functional memory impairment (as assessed by the RBMT), had emerged from post-traumatic amnesia, and had sufficient hand function to use a personal digital assistant. | 3,347.2 days (SD= 4,743.2)  2,363.9 days (SD= 2,467.5)  4,379.8 days (SD= 6,225.45) | 33 years, 6 month  (SD= 12.3)  32 years, 5 months  (SD= 11,0)  34 years, 8 months  (SD= 12.1) | 10 years or less *n*=3; Completed high school *n*=1; Technical and further education *n*=2; University *n*=8; Postgraduate *n=5*  10 years or less *n*=3; Completed high school *n*=4; Technical and further education *n*=8; University *n*=2: Postgraduate *n=4* | Australia |
| Lemoncello et al. 36 | Total *n*= 23 ABI  TAP (Television Assisted Prompting) *n*= 12  TYP (Typical Practice) *n*= 11  *Inclusion*:  ABI at least 12 months prior to the study; at least 18 years old; patients with reports of cognitive challenges that limited completion of home tasks. | 9 years (SD=7.76)  12.45 years (SD= 9.99) | 47.17 (SD=14.45)  47.55 (SD=18.10) | 14.42 (SD=2.43)  15.73 (SD=3.50) | USA |
| Leśniak et al. 37 | Total *n=* 65 ABI (TBI, Stroke, Encephalitis)  GT (Group Therapy *n*)= 22  IT (Individual Therapy) *n*= 23  NT (No Therapy) *n*= 20  *Inclusion:*  memory impairment (diagnosed or reported) after brain lesion; stable medical state; 18-75 years old; no previous history of neurological or psychiatric disease. | 15.2 months (SD= 17.0)  11.6 months (SD= 14.0)  10.0 months (SD= 11.0) | 41.3 (SD= 15.0)  39.6 (SD= 15.0)  42.2 (SD= 14.0) | 13.6 (SD= 2.5)  13.8 (SD= 2.8)  13.4 (SD= 3.2) | Poland |
| McDonald et al. 38 | Total *n*=12  (4 TBI, 4 stroke, 1 anoxic, 1 encephalitis, 1 metabolic encephalopathy, 1 MAV)  *Inclusion:*  all experience everyday memory difficulties, confirmed by a professional or a family member; own mobile phone and computer with internet access which they could use independently; have family members to support and monitor memory aid use. | 53 months (SD= 4.95) | 47 (SD= 11) | not reported | UK |
| Shum et al. 39 | Total *n*= 45 TBI  1 group *n*= 12  2 group *n*=11  3 group *n*=11  4 group *n*=11  *Inclusion:*  diagnosis of moderate/severe GCS= 13 or <, or PTA of 24 h or more, or cerebral contusion or hemorrhage on either CT or MRI; aged 18-60 years; able to communicate in English; ambulant or independently mobile in manual or electric wheelchair; with a significant other available to participate; no prior head injury or hypoxic injury; informed consent. | 273 days (25th quartile: 179.50; 75th quartile: 417.50) | Median 25 (25th quartile: 21.00; 75th quartile: 34.50) | 6 - 17  Median 12.00 (25th quartile: 10.00; 75th quartile: 13.00) | Australia |
| Storzbach, et al. 40 | Total *n*= 119 veterans with mild TBI  EG (CCT - Compensatory Cognitive Training) *n*= 50  CG (UC - Usual Care) *n*= 69  *Inclusion*:  veterans of Operation Enduring Freedom (OEF), Operation Iraqi Freedom (OIF), Operation New Dawn (OND); difficulties with attention, memory, decision making, or processing speed; no DSM-IV criteria for psychotic disorder or substance use disorder; no auditory or visual impairments. | not reported  not reported | 35.4 (SD= 8.4)  34.8 (SD= 7.4) | 13.8 (SD= 1.7)  13.7 (SD= 2.1) | USA |
| Yip & Man 41 | Total *n*= 37 ABI  EG (VRPM) *n*=19  CG *n*=18  *Inclusion*:  18-55 years old; ABI at least 3 months before the intervention; subjective memory complaints or complaints from their main caregivers. | 145.13 days (SD= 97.46)  167.53 days (SD= 149.40) | 37.83 (SD= 10.58)  38.53 (SD= 11.42) | 7.84 (SD= 2.71)  18.61 (SD= 3.79) | Hong Kong |

**Table S1b**

| **Citation** | **Sample and inclusion/exclusion criteria** | **Time since onset** | **Mean age (years)** | **Education (years)** | **Country** |
| --- | --- | --- | --- | --- | --- |
| Hildebrandt et al. 55 | Total *n=* 27 patients, 2 groups  Group 1 (computer treatment *n*)= 12 (2 stroke, 5 subarachnoid bleeding, 5 hypoxia)  Group 2 (group treatment) *n*= 15 (8 stroke, 2 spontaneous intracerebral bleeding, 2 subarachnoid bleeding, 1 tumor, 2 hypoxia)  *Inclusion* (for both groups):  Short delay free-recall performance on CLVT below 10th percentile | 1.8 months (SD=1.2)  1.2 months (SD=1.3) | 50.8 (SD=10.6)  57.9 (SD=12) | not reported | Germany |
| Richter et al. 56 | Total *n*= 36 (25 stroke, 4 TBI, 7 others)  EG (12 stroke, 1 TBI, 5 others) *n*= 18  CG (13 stroke, 3 TBI, 2 others *n*)= 18  *Inclusion*:  outcome score of at least one SD below average on CVLT. | 64.4 days (SD= 90.0)  56.6 days (SD= 75.4) | 50.0 (SD= 8.2)  50.8 (SD= 10.4) | 10.2 (SD unknown)  10.1 (SD unknown) | Germany |
| Richter et al. 57 | Total *n*= 36 (28 stroke, 1 TBI, 7 others)  EG *n*= 18 (14 stroke, 4 others)  CG *n*= 18 (14 stroke, 1 TBI, 3 others)  *Inclusion*:  outcome score of at least one SD below average on CVLT. | 38.8 days (SD= 43.1)  27.6 days (SD= 22.8) | 50.5 (SD= 9.1)  51.2 (SD= 12.6) | 10.3 (SD= 2.19)  10.3 (SD= 2.11) | Germany |
| Withiel et al. 58 | Total *n=* 65 Stroke  MSG (Memory Skills Group) *n*= 24  CCT (Computerized Cognitive Training) *n*= 22  WC (Waitlist Control) *n*=19  *Inclusion:*  history of stroke confirmed by neurological examination and brain imaging at least 3 months before; self or relative reported everyday memory complaints. | 40.9 months (SD= 46.5)  46.3 months (SD= 51.1)  37.3 months (SD= 35.4) | 60.4 (SD= 11.5)  61.7 (SD= 11.6)  60.5 (SD= 16) | 14.3 (SD= 2.1)  14 (SD= 2.6)  14.2 (SD= 2.7) | Australia |

SD= Standard Deviation; CG= control group; EG= experimental group; PCG= placebo control group; RBMT= The Rivermead Behavioral Memory Test; CVLT= California Verbal Learning Test; RBMT-3= The Rivermead Behavioral Memory Test, third edition; EMQ= Everyday Memory Questionnaire; GCSE= General Certificate of Secondary Education; TBI=traumatic brain injury; ABI= Acquired Brain Injury; VRPM= Virtual reality-base prospective memory training; FIM= Functional Independence Measure; MMSE; Mini-Mental State Examination;

**Table S2: Clinic and demographic data of nRCT studies, pre vs post studies and case series**

| **Citation** | **Sample and inclusion/exclusion criteria** | **Time since onset** | **Mean age (years)** | **Education (years)** | **Country** |
| --- | --- | --- | --- | --- | --- |
| Anaki et al. 49 | Total *n*= 40 Brain-damaged  EG *n*= 24 (15 TBI/9 non-TBI)  CG *n*= 16 (10 TBI/6 non-TBI)  *Inclusion*:  age at least 18 years; no mental disorders; no cognitive rehabilitation after hospital discharge; no alcohol or drugs abuse; EG with LTM impairments; CG with no LTM impairments | not reported | 27.5 (SD= 11.51)  31.75 (SD= 13.54) | 12.63 (SD= 3.7)  13.75 (SD= 3.42) | Israel |
| Bergquist et al. 42 | Total *n*= 14 TBI  EG *n*= 6  CG *n*= 8  *Inclusion*:  moderate or severe TBI at least 1 year before the study; sixth grade reading level (WRAT-3); memory impairment (z-score < 1 in any subtest of the RBANS) | not reported | 42 (range 22-61)  48 (range 23-60) | High school or less= 0; some college= 2; college graduate= 4  High school or less= 3; some college= 0; college graduate= 5 | USA |
| Dowds et al. 43 | Total *n*= 36 TBI  *Inclusion:*  18-66 years old; TBI; self-perceived memory impairment; not currently participating in training in the use of external memory aids in a rehabilitation setting or elsewhere; corrected visual acuity adequate to read from paper-based and computer-based displays; and meeting screening criteria for hearing, motor functioning, and cognitive functioning adequate for device usage. | not reported | 42.1 (SD= 14.5) | not reported | USA |
| Evald 50 | Total *n*=13 TBI  *Inclusion:*  18-65 years old; no aphasia, amnestic syndrome, dysexecutive syndrome or comorbid psychiatric disorder to a degree that would prevent them from participation in a group intervention | 11 years (SD= 7.6) | 41.5 (SD= 9.5) | 13.6 (SD= 2.4) | Denmark |
| Lawson et al. 44 | Total *n*= 46 Stroke  EG (Telehealth) *n*= 28  CG (Face-to-face) *n*= 18  *Inclusion*:  age at least 18 years; stroke at least 3 months prior; post-stroke memory difficulties confirmed by self, close-others, or referring clinicians; no neurodegenerative disorder, or severe language or cognitive deficits | not reported | 53.36 (SD= 11.00)  62.00 (SD= 14.69) | 14.00 (SD= 4.02)  14.72 (SD= 2.44) | Australia |
| Lawson et al. 53 | Total *n=*5 Stroke  *Inclusion::*  age at least 18 years; primary diagnosis of stroke at least 3 months prior; post-stroke memory difficulties as reported by self, close-others, or referring clinicians; no comorbid neurodegenerative or major psychiatric condition, or deficits in cognition or language abilities precluding valid engagement with the intervention and assessment measures. | 57 months (SD=89.07) | 57.40 (SD=8.989) | not reported | Australia |
| Miller & Radford 45 | Total *n*= 40 Stroke  ETG (Early Training Group) *n*= 20  LTG (Late Training Group, waitlist) *n*= 20  *Inclusion*:  history of a single stroke; memory complaints; English as language of choice; 18-70 years. | 79.6 months (SD=134.8)  38.0 months (SD= 31.5) | 53.8 (SD=12.3)  48.2 (SD=13.9) | 13.5 (SD=3.1)  13.7 (SD=3.0) | Australia |
| Mitrovic et al. 51 | Total *n=* 15 Stroke  *Inclusion:*  stroke at least six months prior to the study; adequate or corrected hearing and vision; English as the primary spoken language. | not reported | 65 (SD=10) | not reported | New Zealand |
| O’Neil-  Pirozzi 52 | Total *n*= 94 TBI  EG *n*= 54 TBI  CG *n*= 40  *Inclusion*:  18 years or > at the time of injury; TBI of any severity; right-handed; fluent English; memory difficulty post-injury | 11.8 years (SD=9.5)  13.4 years (SD=9.4) | 47.3 (SD=10.8)  47.0 (SD=9.7) | 14.5 (SD=2.2)  15 (SD=2.2) | USA |
| Potvin et al. 46 | Total *n=* 30 TBI  EG *n*=10  CG *n*=20  *Inclusion:*  18-55 years old; French speakers; moderate or severe TBI more than 1 year before; PM ecological test ←1SD; reporting problems on a questionnaire CAPM; ADL independent, but experiencing difficulties on complex activity. | 43.4 months (SD=23.4)  34 months (SD=18.2) | 35 (SD=10.8)  30.9 (SD=10.5) | 11 (SD=1.16)  11.7 (SD=1.98) | Canada |
| Raskin and Sohldberg, 47 | Total *n*= 8 TBI  *Inclusion:*  no previous neurological or psychiatric illness, no diagnosed learning disability, severe depression, or anxiety, no significant visual or hearing deficit, seizure in prior 6 months, no dementia, no illiteracy; at least 1 year post-injury | 84.2 months (SD=21.3) | 41.8 (SD=13.5) | 14.14 (2.52) | USA |
| Raskin et al. 48 | Total *n=* 20 TBI  HC *n*= 20  *Inclusion:*  TBI at least 1 year post-injury but no more than five years; baseline PM performance of less than 10 minutes; severity of injury between moderate and severe to GCS; age>=19; no previous neurologic or psychiatric illness; no learning disability; English speakers. | 217.19 days (SD=198.45) | 42.11 (SD=13.21)  39.15 (SD=14.21) | 13.64 (SD=2.91)  14.95 (SD=2.78) | USA |
| Withiel et al. 54 | Total *n*= 4 Stroke  *Inclusion*:  history of stroke confirmed by neurological examination and brain imaging at least 3 months before; self or close other reported everyday memory complaints. | 17 months (SD=16.43) | 57.75 (SD=9.17) | 15.25 (SD=3.4) | Australia |

SD= Standard Deviation; HC= healthy controls; EG= Experimental group; CG= Control group; TBI=traumatic brain injury; SAH= Subarachnoid hemorrhage; BS= Baseline sample; TS= Training sample; ABD= Acquired Brain Damage; SEM= Standard error of the mean; WRAT-3= Wide Range Achievement Third Edition; RBANS= Repeatable Battery for the Assessment of Neuropsychological Status; ABI= Acquired Brain Injury;

**Table S3: Type of intervention and results of memory rehabilitation RCT studies, separated for studies focused on PM (Table 3a) and on both PM and STM/WM (Table 3b)**

**Table S3a**

| **Citation** | **Sample** | **Memory** | **Intervention** | **Duration** | **Outcome measure** | **Results** | **Ecological outcome/**  **Assessment timepoint** | **Pedro** | **Sackett Scale** |
| --- | --- | --- | --- | --- | --- | --- | --- | --- | --- |
| Aben et al. 32 | Total *n=* 153 Stroke  EG *n*= 77  < 65 years: 57  > 65 years: 20  CG *n*= 76  < 65 years: 58  > 65 years: 18 | LTM | MSE training:  - a general theoretical introduction on memory and stroke;  - training on internal and external memory strategies to improve compensating abilities;  - psychoeducation on the influence that mood; anxiety; and memory-related worries have on memory complaints  Education about causes and consequences of stroke and sharing of their problems | Tot. 9 h  9 sessions of 1 h twice a week | MSE (subscales of Change; Capacity and Anxiety of Metamemory in Adulthood Questionnaire);  Who Qol-Bref;  Social Support List;  AVLT recall;  Story recall of RBMT | - MSE improved significantly in EG compared to CG. The effect was sustained after 6 and 12 months after training  - in EG < 65 years MSE significantly improved compared to CG < 65 years. This result was stable over 12 months  - in EG < 65 years Quality of Life significantly improved compared to CG < 65 years. This result was stable over 12 months. | Assessment time-points: 3 w pre-intervention; 10 d, 6 m and 12 m post- intervention  Assessments and rehabilitation were performed by different researchers | 9 | 1 |
| das Nair et al. 33 | Total *n*= 328 TBI  EG *n*= 171  CG *n*= 157 | LTM | - Usual care plus memory group intervention (4-6 participants): the intervention included restitution strategies and strategies to improve encoding and retrieval. Compensation strategies (mnemonics, use of external devices), "errorless learning" were taught  - Usual care: participants received their usual clinical care during the trial. | Tot. 15 h  10 sessions of 1.5 h, once a week  Tot. 15 h  10 sessions of 1.5 h, once a week | Primary:  EMQ  Secondary:  RBMT-3;  EBIQ;  personal short- and long-term goal attainment;  EQ-5D-5L | -Objectively assessed memory ability favored the memory rehabilitation group at the 6-month, but not at the 12-month follow-up.  - No safety concerns were raised. | Assessment time-points: pre-intervention; 6 m and 12 m post- intervention  Assessments and rehabilitation were performed by different researchers | 7 | 1 |
| Fleming et al. 34 | Total *n=* 52 TBI  COMP-MST (Compensatory Strategy Training + Metacognitive Skill Training) *n*= 17  COMP (Compensatory Strategy Training) *n*= 17  CG (Waitlist Control)= 18 | LTM | - COMP-MST: COMP: education on PM, the impact of TBI on PM, selection and practice of an assistive technology to compensate for PM impairment;; explaining strategies to caregivers; development of time management skills using a “to do” list, organizational strategies, use of reminder alerts; training for strategy generalization to everyday life. MST: “memory journal” to record any specific instances of PM failure or independent strategy use in everyday life, discussed in each session. Manualized MST activities were also used. Feedbacks from the therapist were provided.  - COMP training without MST and “active control”(exercises involving attention, visual processing, or information processing tasks that were unrelated to PM. No feedbacks)  - waiting list, then COMP-MST | Tot. 12 h  6 sessions of 0.5 h of MST and 1.5 h of COMP(6 weeks)  Tot. 12 h  6 sessions of 0.5 h of “active control” and 1.5 h of COMP (6 weeks) | Primary:  BAPM  SPRS-2  Secondary:  CAMPROMT;  AQ;  CANS  Baseline only:  Digit span;  TMT-a and b;  HVLT;  COWA;  Hayling Sentence Completion Test;  Test of Premorbid  Functioning | - No significant differences between the groups on primary or secondary outcome measures.  - Significant pre–post intervention improvements were found for caregiver’s ratings of everyday PM failure for COMP-MST and COMP but not for the CG | Assessment time-points: pre-intervention; immediately and 3 m post-intervention  Assessments and rehabilitation were performed by different researchers | 8 | 1 |
| Lannin et al. 35 | Total *n=* 42 ABI  EG *n*= 21  CG *n*= 21 | LTM | - Training in the use of a PDA;  - Participants chose meaningful activities they wanted to increase their independence in or memory of;  - Therapy guided by the model of attention and incorporated features of errorless learning and a process approach to learning skills;  - Caregivers were involved in the training sessions whenever possible.  Occupational (and other) therapy including use of non-electronic memory devices, involved prioritization of meaningful activities:  - both individual and group sessions  - no use of any electronic devices  - after 8 weeks participants received a PDA with occupational therapy training. | Tot. 7 h (SD=2)  8 weeks  Average: 8 sessions (range 6 - 21)  Tot. 8 h (SD=4)  8 weeks  Average: 9 sessions (range 4- 21) | GAS;  RBMT,  MFQ;  MCQ; | Primary outcomes (at 8 weeks):  - EG demonstrated less memory failures on the GAS and their caregivers reported lower scores on the General Frequency of Forgetting subscale (MFQ) than those who did not;  - Reduction in the number of mnemonic strategies used by participants in the EG in comparison to the CG.  Secondary outcomes:  - Use of internal memory strategies was lower in the EG | Assessment time-points: pre-intervention; 8 w post- intervention (participants of the EG were contacted by telephone and asked to what extent they were still using the PDA).  Assessments and rehabilitation were performed by different researchers | 7 | 1 |
| Lemoncello et al. 36 | Total *n*= 23 ABI  TAP (Television Assisted Prompting) *n*= 12  TYP (Typical Practice) *n*=11 | LTM | - Television Assisted Prompting system: audiovisual reminders at scheduled prospective times on a patient’s home television (2 weeks), then 2 weeks of reminders following typical practice (for 4 blocks);  - 2 weeks of reminders following typical practice, then 2 weeks of TAP (for 4 blocks) | 1 block: 2 weeks of TAP followed by 2 weeks of TYP. 3 blocks (8 weeks) in total;  1 block: 2 weeks of TYP followed by 2 weeks of TAP. 3 blocks (8 weeks) in total; | Task completion for two preferred, two non-preferred, and two structured experimental tasks of PM | - Significant advantage of PM prompting (72% completion) over no prompting (43% completion) | Assessment time-points: pre-intervention; immediately post-intervention | 5 | 2a |
| Leśniak et al. 37 | Total *n=* 65 ABI  GT (Group Therapy)*n*= 22  IT (Individual Therapy)  *n*= 23  NT (No Therapy) *n*= 20 | LTM | - Group therapy focused on awareness of their cognitive deficit and to provide and to generalized strategies to improve memory;  - Individual therapy with the same focus of IG (mostly exercises provided using RehaCom software);  - general recommendations and written instructions about how to deal with their deficit. | Tot. 15 h  15 group sessions of 1 h (for 3 weeks)  Tot. 15 h  15 individual sessions of 1 h (for 3 weeks) | Primary:  RBMT;  Secondary:  CANTAB - PRM;  CANTAB - SSP;  CANTAB - RVP;  EMQ | - Improvement in RBMT for GT, IT and NT;  - IT improved in PRM, SSP and RVP;  - NT improved in PRM;  - After therapy only GT continued to improve in RBMT. | Assessment time-points: pre-intervention; immediately and 4 m post- intervention  Parallel versions of tests were used when possible (only for PRM and RBMT)  Assessments and rehabilitation were performed by different researchers | 6 | 1 |
| McDonald et al. 38 | Total *n*= 12 | LTM | 3 phases:  1) baseline period to record the proportion of tasks that were completed without use of any memory aids  2) introduction and training with the first aid (group A Google Calendar, group B standard diary)  3) Introduction and training with the second aid (group A - standard diary, group B Google Calendar).  Half of the participants received Google Calendar as their first memory aid and the remainder received a standard diary; these interventions were then crossed over in the 3rd phase. | - No aids: 5 weeks  - Google calendar: 5 weeks  - Standard diary: 5 weeks  - Training session:1.5h x2 | Proportion of intentions completed:  - at baseline;  - when using Google Calendar;  - when using a standard diary  - Questionnaire to index individual experience of using aids | - Memory aid use led to a significant improvement in the PM performance of participants. Of these aids, Google Calendar was shown to be significantly more effective than a standard diary in supporting participants to complete their prospective intentions relative to a baseline period where no aids were used.  - Participants also preferred using Google Calendar to a diary, with more people considering using it again and recommending it to others. | - Participants identified activities to target during the study (memory target in real life). A family member monitored and recorded activities remembered and completed at the right time | 5 | 2a |
| Shum et al. 39 | Total *n*= 45 TBI  1 group *n*= 12  2 group *n*=11  3 group *n*=11  4 group *n*=11 | LTM | Participants were randomly assigned to 1 of 4 treatment groups:  - Self-awareness training: PM tasks (time-based; event-based; and activity-based) and self-prediction + monitoring of PM performance on these various tasks;  - Active control for self-awareness training**:** one-to-one therapy, administration of the AMI;  - Compensatory PM training**:** learn use of a diary or organizational device and time management. Standardized simulation scenarios to transfer skills to their daily lives;  - Active control for compensatory PM training: procedure to establish the participant’s existing level of PM ability and to train him/her to lengthen the duration over which of PTA, initial GCS, and IQ | Tot. 12 h  all interventions 8 weekly attendances; each session 1.5 h.  2 weeks’ self-awareness training or active control    6 weeks’ compensatory PM training or active control. | CAMPROMPT;  CAPM (Relative Form);  average number of valid diary entries (per week) | Groups receiving compensatory training showed significantly larger changes on:  - CAMPROMPT: the change was of clinical as well as of statistical  significance | The number of valid diary entries:  generalization of the effect of compensatory training to everyday living.  Assessment time-points: pre-intervention; immediately post- intervention  Parallel versions of tests were used when possible  Assessments and rehabilitation were performed by different researchers | 8 | 1 |
| Storzbach, et al. 40 | Total *n*= 119 veterans with mild TBI  EG (CCT - Compensatory Cognitive Training) *n*= 50  CG (UC - Usual Care)  *n*= 69 | LTM | - CCT: manualized, group-based, compensatory cognitive rehabilitation treatment. Group session consisted of interactive didactic presentations, in-class discussions and activities that introduced cognitive strategies and external aids.  - regular medical, psychiatric, and psychotherapeutic care. | Tot. 20 h  120 minutes of group sessions, once a week for 10 weeks | PRMQ;  MSNQ;  MCQ;  PCSS;  NSI;  WAT-IV;  HVLT;  Digit span and Digit Symbol (from WAIS-IV);  Verbal fluency and Trails (from DKEFS);  PCL-M;  BDI-II;  SLS;  UPSA-brief | - CCT showed a significant decrease in self-reported symptoms (PRMQ, MSNQ, NSI, PCL-M, BDI-II, and SLS) and an increase in cognitive strategy usage (MCQ and PCSS);  - Veterans receiving CCT improved on Digit Span, HVLT Letter Fluency, Trails Category Fluency, Digit Symbol and functional capacity (UPSA-Brief) | Assessment time-points: pre-intervention; 5 w (half intervention) immediately and 5 w post-intervention | 6 | 1 |
| Yip & Man 41 | Total *n*= 37 ABI  EG (VRPM) *n*= 19  CG *n*= 18 | LTM | - Virtual reality prospective memory training programme with 3 training components:  1) PM training (inside a virtual store and consisted of event-based, time-based and ongoing tasks);  2) Retrospective memory training (remember a list of shopping items);  3) Inhibition training component.  - Reading and table games activities without VR | Tot. 6-9 h  12 sessions of 30-45 min, twice a week.  Tot. 6-9 h  12 sessions of 30-45 min, twice a week. | VR test of everyday PM;  Behavioral checklist of PM in a real environment; CAMPROMT;  HKLLT;  Self-efficacy questionnaire in everyday PM | - Significant improvement in VR test of everyday PM task and in behavioral checklist of PM in real life for EG;  - Improvement CAMPROMPT results for EG; | Assessment time-points: pre-intervention; immediately post- intervention  Assessments and rehabilitation were performed by different researchers | 7 | 1 |

**Table S3b**

| **Citation** | **Sample** | **Memory** | **Intervention** | **Duration** | **Outcome measure** | **Results** | **Ecological outcome/**  **Assessment timepoint** | **Pedro** | **Sackett Scale** |
| --- | --- | --- | --- | --- | --- | --- | --- | --- | --- |
| Hildebrandt et al. 55 | Total *n=* 27  Group 1 (computer treatment) *n*= 12  Group 2 (group treatment) *n*= 15 | STM/WM  LTM | VILAT-G software: semantic structuring of verbal information and spaced retrieval. 1 patient per session.  Practicing internally-based mnemonic and verbal strategies to improve the capacity to learn and remember. 8 patients for session. | Tot. 10 h  29.3 days (SD= 7.4)  24.7 days (SD= 7.7). | Digit span backward and forward;  CVLT;  RBMT;  Map learning test; | - Both groups improved in short delayed cue recall; RBMT (appointment and story recall)  - Improvement in CVLT (first and last learning trials; short delayed free-recall and recognition errors) after both treatments but they were more significant for Group 1 | Assessment time-points: pre-intervention; immediately post- intervention  Parallel versions of tests were used when possible.  Assessments and rehabilitation were performed by different researchers | 9 | 1 |
| Richter et al. 56 | Total *n*= 36  EG *n*= 18  CG *n*= 18 | STM/WM  LTM | - Computer-based WM training ("WHOME" software package). Moreover, exercises in phonemic and semantic fluencies and in semantic structuring were performed with the patients;  - Rehearsal of learning strategies and free and cued recall of verbal material (lists of words, short stories, news, information about members) | Tot. 9 h  9 individual sessions of 1 h  Tot. 9 h  9 sessions of 1 h (3 sessions per week) | Digit span backward and forward (WMS);  CVLT;  RBMT;  CFQ | - Significant improvement in WM and PM was found in EG compared CG;  - Episodic memory similarly improved for both groups; | Assessment time-points: pre-intervention; immediately post- intervention  Parallel versions of tests were used when possible  Assessments and rehabilitation were performed by different researchers | 8 | 1 |
| Richter et al. 57 | Total *n*= 36  EG *n*= 18  CG *n*= 18 | STM/WM | - Computer-based WM training ("WHOME" software package) combined with a Recollection Training;  - Standard memory group therapy: patients had to learn and reproduce verbal and visual material | Tot. 9 h  18 sessions of 30 min (4-6 sessions per week)  Tot. 9 h  9 sessions of 1 h (3 sessions per week) | Primary:  EMT;  Secondary:  CVLT;  RBMT (subtest 3-4); Digit Span Forward and Backward; | EG showed a significantly greater improvement WM and | Everyday memory improved in EG compared to CG.  Assessment time-points: pre-intervention; immediately post- intervention  Parallel versions of tests were used when possible  Assessments and rehabilitation were performed by different researchers | 10 | 1 |
| Withiel et al. 58 | Total *n=* 65 Stroke  MSG (Memory Skills Group) *n*= 24  CCT (Computerized Cognitive Training) *n*= 22  WC *n*= 19 | STM/WM  LTM | - Making the Most of your Memory: An Everyday Memory Skills Program. An adapted version of this manualized memory group was selected as the compensatory intervention (3-8 participants);  - *Lumosity* was selected as the computerized cognitive training intervention. Game complexity increases and decreases systematically based on the individual’s performance. Only those games targeting memory functioning were selected;  - No intervention: they were offered a memory intervention of their choice following project completion. | Tot. 12 h  6 weekly 2-h session  Tot. 15 h  30 min a day, 5 days a week for 6 weeks | Primary:  GAS;  Secondary:  RAVLT;  BVMT-R;  RPAProMem;  Symbol span (from WMS-IV);  Digit span (from WAIS-IV);  EMQ-R;  CAPM part A;  Questionnaire of strategies implemented in daily life | - Participants allocated in MSG reported significantly greater attainment of memory goals and internal strategy use at 6-week follow-up relative to participants in CCT and WC;  -Groups did not differ significantly on any subjective or objective secondary outcomes. | Assessment time-points: pre-intervention; immediately and 6 w post- intervention  Parallel versions of tests were used when possible  Assessments and rehabilitation were performed by different researchers | 7 | 1 |

SG= study group; CG= control group; EG= experimental group; PCG= placebo control group; CACR= computer assisted cognitive rehabilitation training group; STM= short-term memory; WM= working memory; LTM= long-term memory; PM= prospective memory; RCT= randomized controlled trial; N-RCT= non-randomized controlled trial; WMT= Working Memory Training; WL=wait list; CVLT= California Verbal Learning Test; RBMT= The Rivermead Behavioural Memory Test; CBTT=Corsi Block Tapping Test; RAVLT= Rey Auditory Verbal Learning test; ROF-copy= Rey-Osterrieth Figure - copy; WAIS-III NI= Wechsler Adult Intelligence Scale 3rd edition - Neuropsychological Instrument; BNIS= Barrow Neurological Institute Screen for Higher Cerebral Functions; AMI= Autobiographical Memory Interview; CAMPROMPT= Cambridge Prospective Memory Test; CAPM= Comprehensive Assessment of Prospective Memory; WM questionnaire= a working memory custommade questionnaire of everyday situations; OT-SRT42= Open Trial Selective Reminding Test; mSMT= the modified Story Memory Technique; MAS-PM= Prose Memory; WMS-III= the Wechsler Memory Scale-3rd edition; ROCF= Rey-Osterrieth Complex Figure Test; AWMA= Automated Working Memory Assessment; EBIQ= European Brain Injury Questionnaire; MSE= Memory Self Efficacy; WhoQol-Bref= World Health Organization Quality of Life Scale; AVLT= Dutch version of Auditory Verbal Learning Test; GAS= Goal Attainment Scaling; BVMT-R= Brief Visuo-Spatial Memory Test-Revised; RPAProMem= Royal Prince Alfred Prospective Memory test; WMS-IV= the Wechsler Memory Scale-IV; WAIS-IV= Wechsler Adult Intelligence Scale-IV; EMQ-R= Everyday Memory Questionnaire Revised; PDA= personal digital assistant; MFQ= Memory Functioning Questionnaire; MCQ= Memory Compensation Questionnaire; WTAR= Wechsler Test of Adult Reading; FSIQ= Full Scale Intelligence Quotient; PQRST= Preview Question Read State Test; VLT= Verbal Learning Test; NVLT= Nonverbal Learning Test; VS= Visual Search; WMI= Working Memory Index; CANTAB= Cambridge Neuropsychological Test Automated Battery; PRM= Pattern Recognition Memory Test; RVP= Rapid Visual information Processing; SSP= Spatial Span test; PASAT= Paced Auditory Serial Attention Test; EMT= Everyday Memory Test; CNT= Computerized neurocognitive function test; DST= the digit span test; VST= visual span test; EQ-5D-5L; EuroQoL Quality of Life five dimensional questionnaire, 5-level version; VR= Virtual Reality; VRPM= Virtual reality-based prospective memory training; HKLLT= Hong Kong List Learning Test; SCNT= Seoul Computerized Neuropsychological Tests; FIM= Functional Independence Measure; CFQ= Cognitive Failure Questionnaire; EMQ= Everyday Memory Questionnaire; DLPFC= Dorsolateral prefrontal cortex;WC= Waitlist control; USC-REMT= University of Southern California Repeatable Episodic Memory Test; COWA= Benton Controlled Oral Word Association Test; MACS= Memory Assessment Clinics Self-Rating Scale; TEA= Test of Everyday Attention; EVT-2= Expressive Vocabulary Test–Second Edition; SDMT= Symbol Digit Modalities Test; BAPM= Brief Assessment of Prospective Memory; SPRS-2= Sydney Psychosocial Reintegration Scale version 2; AQ= Awareness Questionnaire; CANS= Care and Needs Scale; HVLT= Hopkins Verbal Learning Test; TMT= Trail Making Test; PRMQ= Prospective-Retrospective Memory Questionnaire; MSNQ= Multiple Sclerosis Neuropsychological Screening Questionnaire—Patient Version; PCSS= Portland Cognitive Strategies Scale 2.0; NSI= The Neurobehavioral Symptom Inventory; WAT-IV= The Wide Range Achievement Test-IV; DKEFS= Delis-Kaplan Executive Function System; PCL-M= PTSD Checklist—Military Version; BDI-II= Beck Depression Inventory, Second Edition; SLS= Satisfaction with Life Scale ;UPSA-brief= University of California San Diego Performance-Based Skills Assessment, Brief Version; HADS= Hospital Anxiety and Depression Scale; POMS= Profile of Mood States

**Table S4: Results of memory rehabilitation nRCT studies, pre vs post studies and case series**

| **Citation** | **Sample** | **Memory** | **Intervention** | **Duration** | **Outcome measure** | **Results** | **Ecological outcome/**  **Assessment timepoint** | **Sackett Scale** |
| --- | --- | --- | --- | --- | --- | --- | --- | --- |
| Anaki et al. 49 | Total *n*= 40 Brain-damaged  EG *n*= 24  CG *n*= 16 | LTM | Comprehensive, holistic rehabilitation program, based on interactivity and compensatory techniques. The training aimed to integrate social and work life. It consists in individual and group interventions and encompasses occupational therapists,rehabilitative psychologists, speech therapists and physiotherapists. Family members too, cooperate in planning and monitoring the rehabilitation process. | Tot. not reported  1187 mean hours (SD= 710)  1276 mean hours (SD= 909) | RCFT;  RBMT-II;  RAVLT;  16-WMT | - Patients who received more intensive rehabilitation and suffered from CVA (in contrast to TBI) showed more significant memory improvements, regardless of the brain damage’s chronicity.  - no improvements in the RAVLT, in either group.  - In the other three memory tasks, memory performance was better post- compared to pre-treatment.  - improvements in RBMT-II in both groups.  - improvements in RCFT and 16-WMT only in EG (patients with memory impairments) | Assessment time-points: pre-intervention; on average 4 years after intervention (range 1-7 years post-rehabilitation) | 4 |
| Bergquist et al. 42 | Total *n*= 14 TBI  EG *n*= 6  CG *n*= 8 | LTM | 2 internet-based interventions:  - Calendar: three-step calendar acquisition procedure using instant messaging system.  - Diary: use of a diary, but participants were not instructed in the use of the calendar as a compensatory tool | Tot. not reported  60 sessions, 2-3 per week  60 sessions, 2-3 per week | Primary:  Memory and Mood sub-scales of the NFI  Secondary:  CTQ | - no significant differences between groups on the primary outcome; - significant improvements in the use of compensatory strategies;  - participants' relatives reported improved memory and mood after the completion of all sessions. | Assessment time-points: pre-intervention; after 30 sessions (midpoint); immediately post- intervention  Assessments and rehabilitation were performed by different researchers | 2b |
| Dowds et al. 43 | Total *n*= 36 TBI | LTM | At the beginning of week 1, each participant was assigned one time per workday (5 per week) at which they were to call the answering machine at the hospital research office. 3 additional time-related personalized tasks were chosen from their own everyday activities  - Week 1 - baseline condition: remember the 5 call-in tasks and the 3 personalized tasks using only whatever approach they usually employed for remembering future tasks;  - Weeks 2 - 4: training in the use of one randomly assigned memory aid, either a paper-based schedule book with weekly format, a POS-based PDA or a MOS-based PDA;  - Weeks 5 - 8: repetition of weeks 1 to 4, with week 5 again conducted under the baseline condition, and weeks 6 to 8 conducted with memory aids assigned in rerandomized order. | 8 weeks | Principal outcome measure:  rate of timely completion of assigned call-in tasks and personalized tasks. | For TBI receiving reminder cues from contemporary palmtop PDA devices resulted in higher rates of timely task completion than the use of a baseline condition relying on participants’ usual approach to remembering tasks or the use of a paper-based memory aid. |  | 2b |
| Evald 50 | Total *n*= 13 TBI | LTM | Compensatory training: learn the use of a windows smartphone and built-in calendar, tasks, contacts to compensate prospective memory tasks. | Tot. 9 h  1 individual session + 5 group session, each of 1,5 h, within 6 weeks. | Target behaviors completed at home (daily memory log; e-mail reporting task);  PMQ;  PRMQ;  CFQ;  EBIQ;  WhoQol-Bref; | - significant decline pre-post intervention in PMQ and PRMQ score;  - overall effect between pre-intervention and follow-up revealed a significant decline in PMQ, PRMQ and CFQ score | Assessment time-points: pre-intervention; immediately and 2 m post- intervention  Neuropsychological assessment of memory was performed only before treatment | 4 |
| Lawson et al. 44 | Total *n*= 46 Stroke  EG (Telehealth) *n*= 28  CG (Face-to-face) *n*= 18 | LTM | - Modified version of the Monash Memory Skills Group program: psychoeducation, practical training in internal and external compensatory memory strategies, information about relevant impacts from lifestyle. Homework tasks were included. Telehealth sessions were conducted via Zoom.  - Same treatment but face-to-face | Tot. 12 h  6 weekly group session of 2 h for 6 weeks  Tot. 12 h  6 weekly group session of 2 h for 6 weeks | Primary  GAS;  Secondary  EMQ-R;  CAPM Part A;  self-reported Use Checklist;  RPA-ProMem; RAVLT; | - increase in GAS scores for both groups post-intervention, which remained significantly improved from baseline at 6-week follow-up  - both groups showed improvements post-intervention in everyday memory, with the EG demonstrating greater improvement. At follow-up, EG reported further improvements while CG reported a relapse in memory failures  - For prospective memory, there was a statistically significant main effect of time  - participants who received a booster session reported significantly greater improvement in memory functioning | Assessment time-points: pre-intervention; immediately and 6 w post-intervention  Assessments and rehabilitation were performed by different researchers  A single booster session was offered after a 6-week follow-up assessment. The content in the booster session covered a summary of the main program, with discussion around application of trained strategies in a broader range of contexts. | 2b |
| Lawson et al. 53 | Total *n=*5 Stroke | LTM | Telerehabilitation programme includes psychoeducation regarding the impact of stroke on memory functioning, practical training in compensatory memory strategies, and information about lifestyle such as improving diet, exercise, and sleep quality. Included: in-session interactive exercises and between-session homework. | Six weekly two-hour sessions | Primary memory measures  EMQ-R;  CAPM;  Secondary outcome measure:  GAS | - 3 participants demonstrated mean-level improvements in both everyday and prospective memory during the intervention phase  - all 5 showed mean level improvement during the follow-up period compared to baseline on both measures  - statistically significant improvements were inconsistent among these participants. | Assessment time-points:  primary outcome measures were completed weekly throughout baseline, intervention (1 week immediately following baseline) and follow-up phases (commenced subsequent to the intervention). | 4 |
| Miller & Radford 45 | Total *n*= 40 Stroke  ETG (Early Training Group) *n*= 20  LTG (Late Training Group) *n*= 20 | LTM | - Group (8-12 participants) education and training in the use of compensatory strategies (internal strategies and external memory aids). Homework tasks were set to encourage practice and generalization of strategies;  - Waitlist, then same treatment as the other group. | Tot. 12 h  6 weekly group session of 2 h | RAVLT (parallel versions);  CFT (parallel versions);  RPA-ProMem;  CAPM | - Significant training-related improvements on RAVLT (learning and delayed recall) and on CAPM informant report emerged;  - Patients with higher IQ or education showed more improvements in number of strategies used;  - Less time since onset was related to gains in PM, but no other stroke-related variables influenced outcome. | Assessment time-points of ETG:  pre-intervention; immediately after (3 m after first assessment) and 20 w post- intervention  Assessment time-points of LTG:  6 w and immediately pre-intervention (3 m after first assessment); immediately post- intervention (3 m after last assessment)  Parallel versions of tests were used when possible | 2b |
| Mitrovic et al. 51 | Total *n=* 15 Stroke | LTM | Computer-based treatment with Visual Imagery.  Session 1: participants were tested; Sessions 2-4: Visual imagery training; followed by videos (session 5 and 6)  Sessions 4 and 5: participants were introduced to the VR environment. Sessions 6-9: 14 problems presented in the VR environment; in fixed order (nr. and complexity of tasks gradually increased)  Session 9: participant’s PM was again assessed. | Tot. 8 h  2 one-hour-long sessions x week; for 4 weeks. | Digit span;  VAT;  CAMPROMPT;  PA | - PM skills of participants have improved significantly after the treatment; as measured by the CAMPROMPT test;  - The delayed CAMPROMPT test (4 weeks after the VR practice) showed a stable improvement;  - Analyses of the data collected from the visual imagery training, as well as the data from the video and VR practice show that the participants have improved their performance during the study | Assessment time-points: 2 times pre-intervention; 2 times post- intervention | 4 |
| O’Neil-  Pirozzi, 52 | Total *n*= 94  EG *n*= 54 TBI  CG *n*= 40 | LTM | EG: Weeks 2–7: Internal Memory Strategies - I-MEMS (semantic association; semantic elaboration/chaining and imagery (auditory and visual).  + external memory  strategies (memory book; personal digital assistant).  CG: no treatment | Tot. 18 h  12 sessions  90-min group sessions twice weekly for 6 weeks | HVLT-R;  RBMT-II;  WMS-R;  Digit span backward | - Participation in I-MEMS significantly improved memory abilities in HVLT-R and RBMT II;  -Severity of executive function impairment (Digits Backwards) was significantly related to both HVLT and RBMT;  - Benefits of I-MEMS immediately post intervention and maintained and slightly increased at 1 month post intervention;  - Individuals with mild and moderate injury severity significantly improved at both posttest times relative to controls; individuals with severe injuries also exhibited significant gains in outcome scores; although to a lesser degree than the other 2 severity groups. | Assessment time-points: pre-intervention; immediately and 4 w post- intervention  Parallel versions of tests were used when possible | 2b |
| Potvin et al. 46 | Total *n=* 30 TBI  RG= 10  CG= 20 | LTM | PM rehabilitation program based on visual imagery techniques: participants were progressively taught to use visual imagery techniques to associate a specific prospective cue to an intended action in a vivid and distinct mental image within PM tasks gradually more complex and ecological.  one brief educational intervention at the end of the evaluation session, during which the examiner presented various behavioral and cognitive compensatory strategies using a short document that was given to participants at the end to take home. | Tot. 15 h  10 weekly individual rehabilitation sessions lasting approximately 90 minutes.  Tot. <1,5 h  1 brief educational intervention at the end of the evaluation session | TEMP;  Digit Span;  Brown-Peterson Task;  RAVLT;  Sullivan Logical Memory Test;  BVMT-r;  CAPM;  Questionnaire on imagery and verbal habits and skills  2 evaluation sessions of 3 hours each | - Performance on the TEMP (for both prospective and retrospective component) was significantly higher at the post-test in the RG, while no significant differences were detected in the CG; | Average frequency of self-evaluated PM failures was significantly lower at the post-test than at the pre-test in the RG; similar results were observed on the questionnaire filled by relatives (CAPM)  Assessment time-points: pre-intervention; 3 m post- intervention | 2b |
| Raskin and Sohldberg, 47 | Total *n*= 8 TBI | LTM | A. Restitutive PM Training:  repetitive practice carrying out target tasks at increasingly longer time intervals; PM training at 1 minute beyond their baseline ability; then the delay time was progressively increased.  B. same task as in the PM training, but after a specific period of time, the examiner asks the subject to recall the task performed. | Tot. 48 h  1 h sessions, 2 times per week, for 6 months | AIM;  RBMT;  Story Recall and picture recognition (from Randt Memory Test);  PASAT;  PMQ;  EMQ;  CIQ;  diary study | Post-treatment:  - significant improvement in total AIM score and significant reduction in the total number of errors;  Follow-up:  - increased in total AIM score compared to the posttreatment scores;  - no differences on neuropsychological tests | Improvements measured on the EMQ and performance on the diary study  Assessment time-points: pre-intervention; immediately and 1 y post-intervention  Only AIM:  Between A & B | 2b |
| Raskin et al. 48 | Total *n=* 20 BI  HC= 20 | LTM | A: PM training with combined visual imagery of the event occurs with rote repetition (begins at 1 minute beyond their baseline ability and increases as the participant becomes proficient at a time span).  B: PM training (no visual imagery), but after a specific period of time, the examiner asks the subject to recall the task performed. | Tot. 24-48 h  1 h session, 1-2 times per week for 6 months | MIST;  HVLT;  PMQ;  EMQ; WHO-QoL-BREF; Diary Measure | PM performance (MIST) between BI and HC:  - BI were impaired compared to HC on both the short and the long delay, but were not differentially impaired by the long delay;  - the BI group demonstrated reduced performance on action responses relative to verbal responses;  - significant relationship between MIST and measures of executive functioning  Effect of the training:  - significant effect on MIST of treatment A | Generalization of treatment in daily life as measured by the diary and EMQ,  Improvements were maintained for 1 y after the completion of treatment with no further intervention  Assessment time-points: pre-intervention; immediately and 1 y post-intervention  Only MIST:  Between A & B  Parallel versions of tests were used when possible  Assessments and rehabilitation were performed by different researchers | 2b |
| Withiel et al. 54 | Total *n*= 4 Stroke | STM/WM  LTM | Everyday Memory Skills Program:  - each session followed a similar agenda and incorporated psychoeducation, training in internal and external compensatory memory strategies, and discussion of lifestyle issues relevant to memory functioning;  - in-session practice and everyday examples were frequently utilized and weekly sessions started and concluded with a review of group homework;  - family members and caregivers were invited to attend a separate session coinciding with the fourth memory group session, focusing on ways to support their family members. | Tot. 12 h  Tot. 6 sessions, held  weekly, each lasting 2 h | Primary outcome:  EMQ;  Part A of the CAMP; Secondary outcome: GAS;  RAVLT;  BVMT-R;  the Symbol Span subtest (from WMS–IV);  Digit Span Backwards (from WAIS-IV). | - 1 out of the 4 participants reported a significant reduction in the frequency of PM failures during the maintenance period; - All participants described attaining at least one memory specific goal following intervention; - Group participation did not result in meaningful change on neuropsychological measures of memory | Frequency of everyday memory complaints reduced for all participants during the 6 w post-intervention period (significant for 3 participants)  Assessment time-points of primary outcomes:  3 times pre-intervention; 6 times during intervention (once per week); 6 times post-intervention (once per week)  Assessment time-points of primary outcomes:  pre-intervention; immediately and 6 w post-intervention  Parallel versions of tests were used when possible  Assessments and rehabilitation were performed by different researchers | 4 |

HC= healthy controls; EG= Experimental group; CG= Control group; TG= training group; RG= rehabilitation group; TBI=traumatic brain injury; SAH= Subarachnoidal haemorrhage; CVA= cerebral vascular accident; STM= short-term memory; WM= working memory; LTM= long-term memory; PM= prospective memory; 16-WMT= 16-word memory test; EMS= Everyday memory simulations; EON-Mem= Ecologically-oriented Neurorehabilitation of Memory; WOPR= Write-Organize- Picture-Rehearse; CVLT= California Verbal Learning Test; WM2= Visual and Verbal Memory Test; CBTT= Corsi Block Tapping Test; WMS= the Wechsler Memory Scale; HVLT-R= Hopkins Verbal Learning Test–Revised; RBMT-II= Rivermead Behavioral Memory Test II; BDAE= Boston Diagnostic Aphasia Examination; VAT=Visual Association Test; CAMPROMPT= Cambridge Prospective Memory Test; PA= The Paired Associates; PC= personal Computer; PASAT= Paced Auditory Serial Attention Test; WAIS R-NI= Wechsler Adult Intelligence Scale; Revised as a Neuropsychological Instrument; COPM= Canadian Occupational Performance Measure; EMQ-R= Everyday Memory Questionnaire Revised; CAPM= Comprehensive Assessment of Prospective Memory; GAS= Goal Attainment Scaling; BVMT-R= Brief Visuo-Spatial Memory Test-Revised; WMS-IV= the Wechsler Memory Scale-IV; WAIS-IV= Wechsler Adult Intelligence Scale-IV; WASI= Wechsler Abbreviated Scale of intelligence; WAIS-III= Wechsler Adult Intelligence Scale 3rd edition; PMQ= Prospective Memory Questionnaire; PRMQ= Prospective and Retrospective Memory Questionnaire; CFQ= Cognitive Failure Questionnaire; EBIQ= European Brain Injury Questionnaire; WhoQol-Bref= World Health Organization Quality of Life Scale; SWM= the spatial working memory test; TBSS= Tract-Based Spatial Statistics; RCFT= Rey Complex Figure Test; CANTAB= Cambridge Neuropsychological Test Automated Battery; DTI=diffusion tensor imaging; PRM= Pattern Recognition Memory Test; RAVLT= Rey Auditory Verbal Learning test; RVP= Rapid Visual information Processing; SSP= Spatial Span test; AIM= Assessment of Intentional Memory; PDA= personal digital assistant; MIST= Memory for Intentions Test; WHO-QoL-BREF= World Health Organization Quality of Life questionnaire; TEMP= Test écologique de Mémoire Prospective; MMQ= Multifactorial Memory Questionnaire; NFI= Neurobehavioral Functioning Inventory; CTQ= Compensatory Techniques Questionnaire; RPAProMem= Royal Prince Alfred Prospective Memory test; DLPFC= Dorsolateral prefrontal cortex; CIQ= the Community Integration Questionnaire; CFT= Complex Figure Test; CWMS= Categorization Working Memory Span; DMST= Digit Memory Span Test; P-WAB-I= Persian version of revised Western Aphasia Battery; BNT= Boston Naming Test; PNT= Philadelphia Naming Test; C-A= Concrete-Abstract Word & Word Sequences Repetition Test; N & B Narratives= Nicholas and Brookshire Narratives; SEMQ=self-Evaluation Memory Questionnaire; PGWBI= Psychological General Well-Being Index; GAS=the Goal Attainment Scaling.

* - as reported by the authors
