# Supplementary material for: Remembering to Remember: A Systematic Review and Meta-Analysis on Prospective Memory Rehabilitation in Adults with Acquired Brain Injury
Source: Research Square preprint supplement (doi:10.21203/rs.3.rs-7113515/v1), 2025-07-25
Supplement: Supplementary file 3 [file 8d6b31f11dabad5a13ac78ab.docx]

Table 3-Summary of the different rehabilitation approaches adopted in the reviewed studies

| **Neuropsychological Approach** | **Studies** |
| --- | --- |
| Internal/external memory strategies | Aben et al.32, 2014; das Nair et al.33, 2019; Fleming et al.34; Hildebrandt et al. 55; Lannin et al.35; McDonald et al.38; Shum et al.39; Storzbach, et al.40 2017; Withiel et al.58; Dowds et al.43; Evald50; Lawson et al.44; Lawson et al.53; Miller & Radford45; O’Neil-Pirozzi52; Potvin et al.46; Raskin and Sohldberg47; Raskin et al.48 |
| Psychoeducational intervention | Aben et al.32; Leśniak et al.37, 2018; Lawson et al.44; Lawson et al.53 |
| Computer-based cognitive training | Hildebrandt et al. 55; Leśniak et al.37; Richter et al.56; Richter et al.57; Withiel et al. 58; Mitrovic et al.51 |
| Cognitive training with mobile technologies | Lemoncello et al.36; Lawson et al.53 |
| Internet-based cognitive training | Bergquist et al.42 |
| Virtual reality memory training | Yip & Man41 |
| Holistic rehabilitation approach | Anaki et al.49 |
