# Supplementary material for: Remembering to Remember: A Systematic Review and Meta-Analysis on Prospective Memory Rehabilitation in Adults with Acquired Brain Injury
Source: Research Square preprint supplement (doi:10.21203/rs.3.rs-7113515/v1), 2025-07-25
Supplement: Supplementary file 4 [file b50e1a830e12840dcf03b38b.docx]

Table 1. Risk of bias in PM RCT studies as assessed using the Cochrane Collaboration tool

|  | Random sequence generation (*Selection bias*) | Allocation concealment (*Selection bias*) | Binding of participants and researchers (*Performance bias*) | Binding of outcome assessment (*Detection bias*) | Incomplete outcome (*Attrition bias*) | Selective reporting (*Reporting bias*) | Other bias |
| --- | --- | --- | --- | --- | --- | --- | --- |
| Aben et al. (2014) | ∙ | ∙ | ∙ | ∙ | ∙ | ∙ | ∙ |
| Das Nair et al. (2019) | ∙ | ∙ | ∙ | ∙ | ∙ | ∙ | ∙ |
| Fleming et al. (2022) | ∙ | ∙ | ∙ | ∙ | ∙ | ∙ | ∙ |
| Hildebrandt et al. (2014) | ∙ | ∙ | ∙ | ∙ | ∙ | ∙ | ∙ |
| Lannin et al. (2014) | ∙ | ∙ | ∙ | ∙ | ∙ | ∙ | ∙ |
| Lemoncello et al. (2011) | ∙ | ∙ | ∙ | ∙ | ∙ | ∙ | ∙ |
| Lesniak et al. (2018) | ∙ | ∙ | ∙ | ∙ | ∙ | ∙ | ∙ |
| McDonald et al. (2011) | ∙ | ∙ | ∙ | ∙ | ∙ | ∙ | ∙ |
| Richter et al. (2015) | ∙ | ∙ | ∙ | ∙ | ∙ | ∙ | ∙ |
| Shum et al. (2011) | ∙ | ∙ | ∙ | ∙ | ∙ | ∙ | ∙ |
| Storzbach et al. (2017) | ∙ | ∙ | ∙ | ∙ | ∙ | ∙ | ∙ |
| Yip & Man (2013) | ∙ | ∙ | ∙ | ∙ | ∙ | ∙ | ∙ |
| Whithiel et al. (2019) | ∙ | ∙ | ∙ | ∙ | ∙ | ∙ | ∙ |

**Key**

∙ = Low risk of bias

∙ = High risk of bias

∙ = Unclear risk of bias
